# Supplementary material
Source: publisher figshare collection journal article supplement (https://f1000.figshare.com/ndownloader/files/1080061)
Supplement: Supplementary file 1 [file 1080061]

Sample	Medium	Light	Dil	A720	A663.2	A645	Chl a	Chl b	Tot Chl	Chl a/b	Chl a/b	Cells/ml	Chl/Cell
6F14	TAP	0	1	0	0.199	0.067	2.63	0.66	3.29	3.95	4.67	2475000	1.33E-06
6F14	TAP	0	1	0.001	0.209	0.126	2.58	2.08	4.66	1.24	1.25	2395000	1.95E-06
6F14	TAP	0	1	0	0.302	0.137	3.88	1.9	5.78	2.04	2.15	2275000	2.54E-06
6F14	TAP	0	1	0	0.347	0.098	4.64	0.68	5.32	6.78	9.74	1975000	2.69E-06
6F14	TAP	0	1	0	0.234	0.085	3.07	0.94	4.01	3.27	3.71	1678000	2.39E-06
6F14	TAP	0	1	0.002	0.199	0.078	2.57	0.9	3.47	2.85	3.15	2127500	1.63E-06
6F14	TAP	0	1	0.01	0.233	0.077	2.97	0.54	3.51	5.49	7.17	2475000	1.42E-06
6F14	TAP	0	1	0	0.245	0.168	2.98	2.98	5.95	1	1	1975000	3.01E-06
6F14	TAP	0	1	0	0.256	0.132	3.24	2.01	5.25	1.61	1.66	1985000	2.65E-06
4A+	TAP	0	1	0	0.243	0.083	3.2	0.84	4.05	3.81	4.46	2270000	1.78E-06
4A+	TAP	0	1	0.004	0.222	0.095	2.82	1.17	4	2.41	2.59	2333000	1.71E-06
4A+	TAP	0	1	0.004	0.287	0.113	3.69	1.29	4.99	2.86	3.16	2458000	2.03E-06
4A+	TAP	0	1	0.007	0.233	0.133	2.83	2.01	4.85	1.41	1.43	2575000	1.88E-06
4A+	TAP	0	1	0	0.265	0.128	3.38	1.86	5.24	1.81	1.89	2050000	2.56E-06
4A+	TAP	0	1	0.004	0.221	0.131	2.7	2.09	4.79	1.3	1.31	2295000	2.09E-06
4A+	TAP	0	1	0	0.245	0.135	3.08	2.14	5.22	1.44	1.46	2657000	1.96E-06
4A+	TAP	0	1	0	0.231	0.157	2.81	2.77	5.58	1.01	1.01	2155000	2.59E-06
4A+	TAP	0	1	0	0.217	0.131	2.69	2.19	4.88	1.23	1.24	2397500	2.03E-06
6F14	TAP	10	1	0	0.252	0.098	3.29	1.17	4.46	2.8	3.08	2775000	1.61E-06
6F14	TAP	10	1	0	0.249	0.09	3.27	0.99	4.26	3.31	3.76	2725000	1.56E-06
6F14	TAP	10	1	0	0.257	0.095	3.37	1.07	4.44	3.14	3.53	2547500	1.74E-06
6F14	TAP	10	1	0.001	0.247	0.081	3.26	0.75	4.01	4.34	5.25	2655000	1.51E-06
6F14	TAP	10	1	0	0.301	0.113	3.94	1.3	5.24	3.03	3.38	2657500	1.97E-06
6F14	TAP	10	1	0	0.235	0.091	3.07	1.08	4.15	2.83	3.12	2775000	1.50E-06
6F14	TAP	10	1	0.01	0.251	0.087	3.19	0.7	3.89	4.56	5.6	2657500	1.47E-06
6F14	TAP	10	1	0	0.299	0.089	3.98	0.7	4.69	5.66	7.48	2375000	1.97E-06
6F14	TAP	10	1	0	0.268	0.094	3.53	0.99	4.52	3.56	4.11	2675000	1.69E-06
4A+	TAP	10	1	0	0.359	0.147	4.66	1.86	6.52	2.51	2.72	1730000	3.77E-06
4A+	TAP	10	1	0.002	0.342	0.142	4.41	1.78	6.19	2.48	2.68	1547000	4.00E-06
4A+	TAP	10	1	0.006	0.369	0.15	4.73	1.76	6.49	2.68	2.93	1870000	3.47E-06
4A+	TAP	10	1	0	0.375	0.137	4.92	1.52	6.44	3.23	3.65	1475000	4.37E-06
4A+	TAP	10	1	0	0.369	0.128	4.86	1.33	6.19	3.66	4.25	1857500	3.33E-06
4A+	TAP	10	1	0	0.336	0.145	4.34	1.93	6.27	2.25	2.4	1630000	3.84E-06
4A+	TAP	10	1	0.001	0.368	0.136	4.81	1.51	6.32	3.18	3.58	1275000	4.96E-06
4A+	TAP	10	1	0	0.367	0.149	4.77	1.87	6.64	2.55	2.77	1547500	4.29E-06
4A+	TAP	10	1	0.002	0.354	0.167	4.51	2.35	6.85	1.92	2.01	1775000	3.86E-06
6F14	TAP	40	1	0	0.21	0.084	2.73	1.04	3.77	2.64	2.87	2000000	1.88E-06
6F14	TAP	40	1	0.012	0.186	0.092	2.23	1.12	3.35	1.99	2.09	2826000	1.19E-06
6F14	TAP	40	1	0	0.187	0.088	2.39	1.26	3.65	1.9	1.99	2557000	1.43E-06
6F14	TAP	40	1	0	0.192	0.102	2.42	1.58	4.01	1.53	1.57	2457500	1.63E-06
6F14	TAP	40	1	0	0.194	0.098	2.46	1.47	3.93	1.67	1.73	2355000	1.67E-06
6F14	TAP	40	1	0.002	0.168	0.081	2.12	1.14	3.26	1.87	1.95	2175000	1.50E-06
6F14	TAP	40	1	0.01	0.198	0.087	2.44	0.97	3.41	2.51	2.71	2647500	1.29E-06
6F14	TAP	40	1	0	0.214	0.129	2.65	2.15	4.81	1.23	1.24	2455000	1.96E-06
6F14	TAP	40	1	0.003	0.213	0.111	2.66	1.64	4.3	1.62	1.67	2750000	1.56E-06
4A+	TAP	40	1	0.002	0.734	0.356	9.34	5.16	14.5	1.81	1.88	2477000	5.85E-06
4A+	TAP	40	1	0.002	0.74	0.384	9.34	5.83	15.17	1.6	1.65	2522000	6.02E-06
4A+	TAP	40	1	0.002	0.763	0.347	9.78	4.78	14.56	2.05	2.16	2454000	5.93E-06
4A+	TAP	40	1	0	0.843	0.298	11.09	3.17	14.26	3.49	4.01	2480000	5.75E-06
4A+	TAP	40	1	0	0.721	0.248	9.5	2.54	12.04	3.74	4.36	2975000	4.05E-06
4A+	TAP	40	1	0	0.764	0.343	9.83	4.72	14.54	2.08	2.2	2257500	6.44E-06
4A+	TAP	40	1	0.001	0.724	0.264	9.48	2.91	12.39	3.26	3.69	2375000	5.22E-06
4A+	TAP	40	1	0	0.755	0.469	9.32	7.94	17.26	1.17	1.18	2355000	7.33E-06
4A+	TAP	40	1	0	0.648	0.354	8.14	5.59	13.74	1.46	1.49	2455000	5.60E-06
6F14	TAP	75	1	0.001	0.008	0.001	0.1	-0.04	0.06	-2.76	-2.29	2125000	2.98E-08
6F14	TAP	75	1	0	0.005	0.002	0.07	0.02	0.09	2.64	2.87	2250000	3.99E-08
6F14	TAP	75	1	0	0.002	0	0.03	-0.01	0.02	-2.76	-2.29	2076000	8.73E-09
6F14	TAP	75	1	0	0.003	0.001	0.04	0.01	0.05	4.06	4.83	2197500	2.25E-08
6F14	TAP	75	1	0	0.007	0	0.1	-0.04	0.06	-2.76	-2.29	2075500	3.05E-08
6F14	TAP	75	1	0	0.004	0	0.06	-0.02	0.04	-2.76	-2.29	2225000	1.63E-08
6F14	TAP	75	1	0	0.005	0.001	0.07	0	0.07	-123.53	-16.22	1957500	3.45E-08
6F14	TAP	75	1	0	0.004	0.001	0.05	0	0.06	11.69	26.8	2275000	2.57E-08
6F14	TAP	75	1	0	0.003	0	0.04	-0.02	0.03	-2.76	-2.29	2175000	1.25E-08
4A+	TAP	75	1	0	0.578	0.225	7.54	2.7	10.24	2.8	3.08	3281000	3.12E-06
4A+	TAP	75	1	0.037	0.593	0.234	7.31	2.1	9.41	3.47	3.98	3250000	2.90E-06
4A+	TAP	75	1	0	0.5	0.202	6.5	2.52	9.02	2.58	2.81	3156000	2.86E-06
4A+	TAP	75	1	0	0.559	0.157	7.47	1.08	8.55	6.93	10.05	3475500	2.46E-06
4A+	TAP	75	1	0	0.578	0.199	7.62	2.04	9.66	3.73	4.35	3255500	2.97E-06
4A+	TAP	75	1	0	0.489	0.255	6.18	3.91	10.1	1.58	1.62	3157500	3.20E-06
4A+	TAP	75	1	0.001	0.547	0.167	7.26	1.37	8.63	5.29	6.81	3275500	2.64E-06
4A+	TAP	75	1	0	0.523	0.258	6.66	3.81	10.47	1.75	1.81	3175500	3.30E-06
4A+	TAP	75	1	0	0.531	0.269	6.74	4.05	10.79	1.66	1.72	2975500	3.63E-06
6F14	TAP	100	1
4A+	TAP	100	1	0.008	0.373	0.148	4.77	1.65	6.42	2.89	3.2	3350000	1.92E-06
4A+	TAP	100	1	0.009	0.358	0.168	4.48	2.21	6.69	2.03	2.13	3150000	2.13E-06
4A+	TAP	100	1	0.003	0.385	0.215	4.79	3.38	8.17	1.42	1.44	3250000	2.51E-06
4A+	TAP	100	1	0	0.468	0.147	6.21	1.3	7.51	4.79	5.97	3258000	2.30E-06
4A+	TAP	100	1	0	0.425	0.132	5.64	1.14	6.78	4.95	6.24	2875500	2.36E-06
4A+	TAP	100	1	0.001	0.444	0.111	5.97	0.49	6.46	12.15	29.47	2675000	2.41E-06
4A+	TAP	100	1	0	0.421	0.125	5.61	0.98	6.59	5.7	7.56	2675000	2.46E-06
4A+	TAP	100	1	0.003	0.369	0.134	4.81	1.42	6.23	3.39	3.87	3275000	1.90E-06
4A+	TAP	100	1	0	0.412	0.147	5.41	1.58	7	3.42	3.9	2955000	2.37E-06
6F14	HS	10	1	0.003	0.23	0.087	2.97	0.95	3.92	3.13	3.52	2347500	1.67E-06
6F14	HS	10	1	0.003	0.21	0.112	2.61	1.68	4.3	1.55	1.59	2550000	1.69E-06
6F14	HS	10	1	0.01	0.198	0.098	2.41	1.25	3.66	1.92	2.02	2157500	1.70E-06
6F14	HS	10	1	0	0.199	0.085	2.57	1.12	3.69	2.3	2.46	2430000	1.52E-06
6F14	HS	10	1	0.007	0.214	0.104	2.65	1.38	4.03	1.92	2.01	2150000	1.87E-06
6F14	HS	10	1	0	0.187	0.098	2.36	1.51	3.87	1.57	1.61	2430000	1.59E-06
6F14	HS	10	1	0	0.201	0.085	2.6	1.11	3.71	2.35	2.52	2550000	1.45E-06
6F14	HS	10	1	0	0.236	0.075	3.13	0.68	3.8	4.63	5.71	2500000	1.52E-06
6F14	HS	10	1	0	0.213	0.081	2.78	0.95	3.73	2.94	3.27	2100000	1.78E-06
4A+	HS	10	1	0.004	0.587	0.248	7.55	3.15	10.7	2.4	2.58	2555000	4.19E-06
4A+	HS	10	1	0.005	0.594	0.222	7.72	2.44	10.16	3.17	3.56	2535000	4.01E-06
4A+	HS	10	1	0.004	0.576	0.288	7.28	4.22	11.49	1.73	1.79	2750000	4.18E-06
4A+	HS	10	1	0	0.599	0.254	7.75	3.32	11.07	2.33	2.5	2480000	4.46E-06
4A+	HS	10	1	0.003	0.583	0.298	7.36	4.45	11.81	1.65	1.7	2845000	4.15E-06
4A+	HS	10	1	0	0.545	0.21	7.11	2.49	9.6	2.86	3.16	2575000	3.73E-06
4A+	HS	10	1	0	0.51	0.321	6.28	5.47	11.75	1.15	1.15	2975000	3.95E-06
4A+	HS	10	1	0	0.523	0.302	6.52	4.92	11.45	1.33	1.34	2875000	3.98E-06
4A+	HS	10	1	0	0.499	0.365	5.99	6.64	12.63	0.9	0.9	2975000	4.25E-06
6F14	HS	40	1	0	0.098	0.026	1.31	0.15	1.47	8.72	14.69	2030000	7.22E-07
6F14	HS	40	1	0	0.091	0.027	1.21	0.21	1.42	5.72	7.59	2675000	5.32E-07
6F14	HS	40	1	0	0.135	0.023	1.85	-0.12	1.73	-15.97	-8.39	2210000	7.85E-07
6F14	HS	40	1	0.001	0.158	0.025	2.16	-0.2	1.96	-10.58	-6.54	2578500	7.58E-07
6F14	HS	40	1	0	0.12	0.01	1.68	-0.37	1.31	-4.57	-3.52	2257500	5.80E-07
6F14	HS	40	1	0	0.115	0.041	1.51	0.44	1.95	3.42	3.91	2455000	7.95E-07
6F14	HS	40	1	0	0.083	0.033	1.08	0.4	1.49	2.67	2.92	2357000	6.30E-07
6F14	HS	40	1	0.002	0.099	0.035	1.28	0.33	1.61	3.85	4.51	2335000	6.90E-07
6F14	HS	40	1	0	0.121	0.029	1.63	0.11	1.74	15.15	59.91	2375000	7.33E-07
4A+	HS	40	1	0.011	0.559	0.245	7.08	3.08	10.16	2.3	2.46	3111000	3.27E-06
4A+	HS	40	1	0.005	0.568	0.32	7.05	5.05	12.1	1.4	1.42	3000000	4.03E-06
4A+	HS	40	1	0.012	0.581	0.256	7.35	3.22	10.58	2.28	2.44	3194000	3.31E-06
4A+	HS	40	1	0	0.469	0.247	5.92	3.81	9.74	1.55	1.59	2875000	3.39E-06
4A+	HS	40	1	0	0.375	0.268	4.52	4.83	9.35	0.94	0.93	2987500	3.13E-06
4A+	HS	40	1	0	0.533	0.212	6.94	2.6	9.54	2.67	2.91	3107500	3.07E-06
4A+	HS	40	1	0	0.428	0.354	5.02	6.73	11.74	0.75	0.73	3275000	3.59E-06
4A+	HS	40	1	0.001	0.501	0.298	6.21	4.92	11.13	1.26	1.28	3120000	3.57E-06
4A+	HS	40	1	0	0.432	0.278	5.3	4.79	10.09	1.11	1.11	3255000	3.10E-06
6F14	HS	75	1	0.004	0.068	0.038	0.81	0.53	1.34	1.53	1.57	2340000	5.71E-07
6F14	HS	75	1	0	0.079	0.025	1.05	0.22	1.27	4.69	5.8	2825000	4.50E-07
6F14	HS	75	1	0.002	0.086	0.044	1.07	0.63	1.69	1.7	1.76	2650000	6.39E-07
6F14	HS	75	1	0.002	0.092	0.024	1.21	0.09	1.3	13.33	38.15	2340000	5.57E-07
6F14	HS	75	1	0	0.079	0.031	1.03	0.37	1.4	2.75	3.02	2825000	4.97E-07
6F14	HS	75	1	0	0.097	0.034	1.28	0.36	1.63	3.57	4.11	2650000	6.17E-07
6F14	HS	75	1	0	0.078	0.029	1.02	0.33	1.35	3.1	3.47	2657500	5.08E-07
6F14	HS	75	1	0	0.081	0.038	1.04	0.54	1.58	1.92	2.01	2375000	6.64E-07
6F14	HS	75	1	0.001	0.088	0.028	1.16	0.23	1.39	4.97	6.26	2765000	5.02E-07
4A+	HS	75	1	0.005	0.452	0.235	5.66	3.5	9.16	1.62	1.67	2825000	3.24E-06
4A+	HS	75	1	0.012	0.498	0.227	6.26	2.92	9.18	2.14	2.27	2675000	3.43E-06
4A+	HS	75	1	0.012	0.501	0.249	6.24	3.46	9.7	1.8	1.88	2850000	3.40E-06
4A+	HS	75	1	0.011	0.441	0.197	5.55	2.48	8.03	2.24	2.39	2650000	3.03E-06
4A+	HS	75	1	0.004	0.487	0.193	6.3	2.28	8.57	2.76	3.04	2318000	3.70E-06
4A+	HS	75	1	0.011	0.439	0.196	5.53	2.46	7.99	2.25	2.4	2600000	3.07E-06
4A+	HS	75	1	0.001	0.485	0.258	6.11	3.99	10.09	1.53	1.57	2585000	3.91E-06
4A+	HS	75	1	0	0.421	0.231	5.29	3.66	8.95	1.45	1.48	2975000	3.01E-06
4A+	HS	75	1	0	0.398	0.214	5.01	3.35	8.36	1.5	1.53	2675000	3.13E-06
6F14	HS	100
4A+	HS	100	1	0.007	0.438	0.164	5.65	1.74	7.39	3.25	3.68	3025000	2.44E-06
4A+	HS	100	1	0.009	0.405	0.131	5.26	1.04	6.3	5.08	6.45	3100000	2.03E-06
4A+	HS	100	1	0.008	0.471	0.127	6.22	0.62	6.84	10.12	19.46	2585000	2.65E-06
4A+	HS	100	1	0	0.378	0.186	4.81	2.74	7.56	1.75	1.82	2775000	2.72E-06
4A+	HS	100	1	0	0.353	0.175	4.49	2.6	7.09	1.73	1.79	3125500	2.27E-06
4A+	HS	100	1	0	0.415	0.156	5.43	1.8	7.23	3.02	3.37	2750000	2.63E-06
4A+	HS	100	1	0	0.498	0.168	6.57	1.67	8.24	3.93	4.64	3150000	2.62E-06
4A+	HS	100	1	0	0.443	0.198	5.7	2.71	8.41	2.1	2.22	3010000	2.79E-06
4A+	HS	100	1	0	0.467	0.0167	6.59	-1.99	4.6	-3.32	-2.69	2975000	1.55E-06
